# Supplementary material for: Effect of Prenatal Iron Supplementation Adapted to Hemoglobin Levels in Early Pregnancy on Fetal and Neonatal Growth—ECLIPSES Study
Source: MDPI journal article supplement (doi:10.3390/nu16030437), 2024-02-01
Supplement: s1 [file s1]

## Effect of prenatal iron supplementation adapted to hemoglobin levels in early pregnancy on the fetal and neonatal growth. ECLIPSES Study

**Table S1.** Comparison of fetal growth parameters during pregnancy and birth parameters according to iron supplementation groups.

| Parameters                                         | Iron supplementation group |                      |                      |         |           |                      |                      |         |
|----------------------------------------------------|----------------------------|----------------------|----------------------|---------|-----------|----------------------|----------------------|---------|
|                                                    | Stratum 1                  |                      |                      |         | Stratum 2 |                      |                      |         |
|                                                    | N                          | 40 mg/d<br>Mean ± SD | 80 mg/d<br>Mean ± SD | p value | N         | 20 mg/d<br>Mean ± SD | 40 mg/d<br>Mean ± SD | p value |
| Fetal growth parameters                            |                            |                      |                      |         |           |                      |                      |         |
| First trimester (12 weeks)                         |                            |                      |                      |         |           |                      |                      |         |
| Gestational age (weeks)                            | 529                        | 11.9 ± 0.6           | 12.0 ± 0.6           | 0.699   | 262       | 11.9 ± 0.5           | 12.0 ± 0.6           | 0.521   |
| Crown-rump length (mm)                             | 525                        | 59.9 ± 8.4           | 59.7 ± 7.8           | 0.741   | 262       | 60.5 ± 8.0           | 59.8 ± 7.3           | 0.465   |
| Biparietal diameter (mm)                           | 269                        | 20.4 ± 2.5           | 20.5 ± 2.3           | 0.800   | 142       | 20.3 ± 2.7           | 20.7 ± 2.8           | 0.415   |
| Second trimester (20 weeks)                        |                            |                      |                      |         |           |                      |                      |         |
| Gestational age (weeks)                            | 425                        | 20.0 ± 0.8           | 20.0 ± 0.7           | 0.715   | 214       | 20.0 ± 0.7           | 20.0 ± 0.8           | 0.586   |
| Estimated fetal weight (g)                         | 425                        | 363.5 ± 63.0         | 363.7 ± 55.7         | 0.972   | 214       | 364.7 ± 55.4         | 359.6 ± 58.4         | 0.514   |
| Femur length (mm)                                  | 425                        | 33.0 ± 2.8           | 33.0 ± 2.5           | 0.965   | 214       | 32.8 ± 2.7           | 33.3 ± 2.5           | 0.139   |
| Head circumference (mm)                            | 423                        | 177.5 ± 10.4         | 178.1 ± 10.6         | 0.607   | 214       | 178.0 ± 9.9          | 178.9 ± 8.7          | 0.496   |
| Biparietal diameter (mm)                           | 423                        | 48.3 ± 3.1           | 48.1 ± 3.4           | 0.673   | 214       | 48.0 ± 3.0           | 48.3 ± 2.8           | 0.487   |
| Abdominal circumference (mm)                       | 425                        | 152.5 ± 10.8         | 153.9 ± 10.1         | 0.189   | 214       | 153.0 ± 10.1         | 153.0 ± 9.6          | 0.974   |
| Third trimester (33 weeks)                         |                            |                      |                      |         |           |                      |                      |         |
| Gestational age (weeks)                            | 473                        | 33.4 ± 1.2           | 33.3 ± 1.2           | 0.367   | 232       | 33.4 ± 1.4           | 33.4 ± 1.6           | 0.964   |
| Estimated fetal weight (g)                         | 473                        | 2277.8 ± 288.2       | 2239.6 ± 292.5       | 0.155   | 232       | 2275.9 ± 305.5       | 2271.5 ± 382.6       | 0.923   |
| Femur length (mm)                                  | 473                        | 64.8 ± 3.0           | 64.4 ± 3.2           | 0.142   | 232       | 64.4 ± 3.5           | 64.4 ± 3.1           | 0.981   |
| Head circumference (mm)                            | 472                        | 304.6 ± 12.8         | 304.2 ± 13.4         | 0.715   | 232       | 304.3 ± 15.4         | 303.7 ± 13.4         | 0.740   |
| Biparietal diameter (mm)                           | 472                        | 84.9 ± 3.5           | 84.5 ± 4.0           | 0.214   | 232       | 84.7 ± 4.8           | 84.8 ± 4.1           | 0.880   |
| Abdominal circumference (mm)                       | 472                        | 295.5 ± 16.1         | 294.7 ± 17.4         | 0.607   | 232       | 295.1 ± 19.7         | 296.9 ± 15.2         | 0.437   |
| Birth parameters                                   |                            |                      |                      |         |           |                      |                      |         |
| Gestational age (weeks)                            | 451                        | 39.6 ± 1.6           | 39.6 ± 1.5           | 0.934   | 232       | 39.6 ± 1.8           | 39.5 ± 1.5           | 0.375   |
| Birthweight (g)                                    | 451                        | 3294.9 ± 458.8       | 3279.3 ± 448.3       | 0.742   | 232       | 3254.5 ± 502.2       | 3324.4 ± 515.2       | 0.297   |
| Birthweight-for-gestational-age (z-score)*         | 451                        | 0.06 ± 0.88          | 0.01 ± 1.00          | 0.531   | 232       | -0.02 ± 1.12         | 0.09 ± 0.99          | 0.434   |
| Length (cm)                                        | 361                        | 49.3 ± 1.9           | 49.2 ± 2.3           | 0.709   | 187       | 49.3 ± 2.2           | 49.5 ± 2.3           | 0.588   |
| Length-for-gestational-age (z-score)*              | 361                        | -0.04 ± 0.96         | -0.06 ± 1.14         | 0.875   | 187       | -0.04 ± 1.13         | -0.02 ± 1.16         | 0.922   |
| Head circumference (cm)                            | 281                        | 34.6 ± 1.4           | 34.4 ± 1.6           | 0.170   | 162       | 34.5 ± 1.4           | 34.8 ± 1.9           | 0.349   |
| Head circumference -for-gestational-age (z-score)* | 281                        | 0.59 ± 1.07          | 0.41 ± 1.11          | 0.170   | 162       | 0.54 ± 1.10          | 0.63 ± 1.15          | 0.622   |
| Female sex, n (%)                                  | 496                        | 138 (56)             | 121 (49)             | 0.105   | 254       | 61 (48)              | 61 (48)              | 0.904   |

Values are expressed as a mean ± SD (standard deviation). P value for the differences across supplementation dose as derived from independent samples Student's T-test. \*z-scores according to the INTERGROWTH-21st standards.

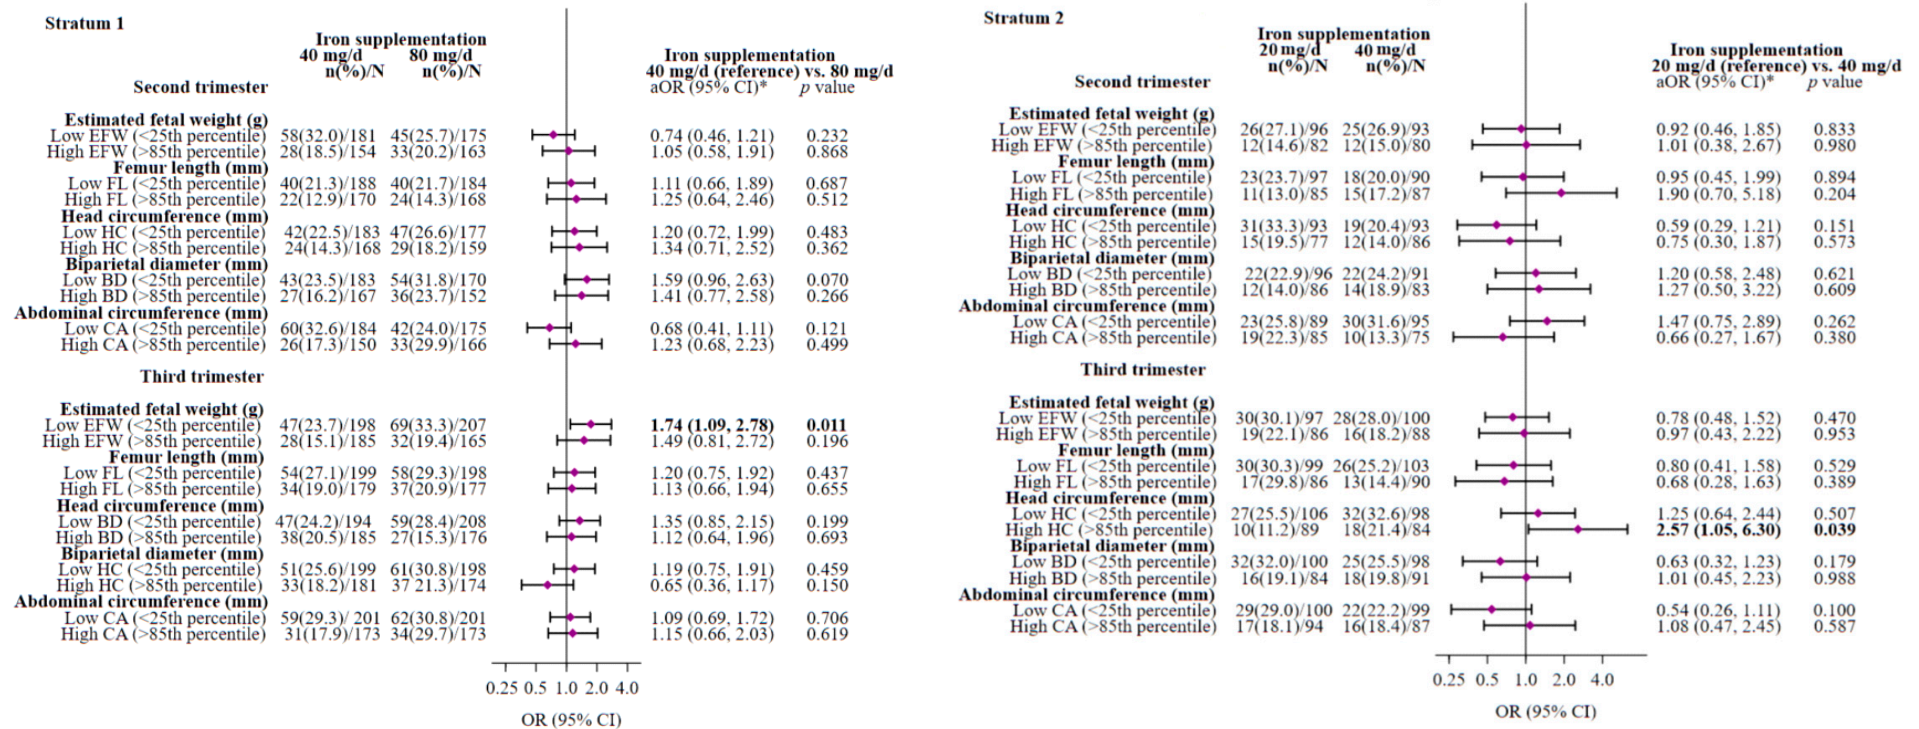

**Figure S1.** Multivariable-adjusted ORs (95% CIs) of low (<25th percentile) and high (>85th percentile) fetal growth in the second and third trimester pregnancy associated with maternal iron supplementation throughout pregnancy on stratum 1 (80 or 40 mg/d) and stratum 2 (40 or 20 mg/d).

The reference group was 40 mg/d dose group for stratum 1 and 20 mg/d dose group for stratum 2. Abbreviations: EFW, estimated fetal weight; FL, femur length; HC, head circumference; BD, biparietal diameter; AC, abdominal circumference. All fetal growth parameter values were corrected for gestational age (weeks) at the time of ultrasound measurement using residual method. \*Models were adjusted for sex of baby, maternal age (years), maternal early-pregnancy BMI categories (normal weight (ref.), overweight, obesity), family SES (low(ref.), medium, high), smoking during pregnancy (no (ref.), yes), fiber intake at the first trimester, log-serum ferritin ( $\mu\text{g/L}$ ) at the first trimester, cortisol ( $\mu\text{g/dl}$ ) at the first trimester, carrier of HFE gene mutation (no (ref.), yes for stratum 2), and gestational weight gain (kg, only for third trimester analysis). The significance of numbers in bold is p-value <0.05. Low (<25th percentile) or high (>85th percentile) fetal growth versus normal fetal growth (25th to 85th percentile) for gestational age-adjusted EFW, FL, HC, BD or AC based on distribution percentile from the study population as reference. The diamonds represent OR and the whisker plots represent 95% CIs. n, number of cases infants (%); N, number of total infants.
